# Supplementary material for: Altered brain ion gradients following compensation for elevated CO2 are linked to behavioural alterations in a coral reef fish
Source: PubMed Central journal article supplement (PMC5020430; doi:10.1038/srep33216), 2016-09-13
Supplement: srep33216-s1.pdf [file srep33216-s1.pdf]

Title: Altered brain ion gradients following compensation for elevated CO<sub>2</sub> are linked to behavioural alterations in a coral reef fish

### Supplementary information

\*Heuer, R.M.<sup>1,2</sup>, Welch, M.J.<sup>3,4</sup>, Rummer, J.L.<sup>3</sup>, Munday, P.L.<sup>3</sup>, Grosell, M.<sup>2</sup>

<sup>1</sup> University of North Texas, 1511 West Sycamore, Denton, TX 76203, <sup>2</sup> University of Miami, RSMAS, 4600 Rickenbacker Causeway, Miami, FL 33149. <sup>3</sup> Australian Research Council Centre of Excellence for Coral Reef Studies, James Cook University, Townsville, Queensland, 4811, Australia. <sup>4</sup> College of Marine and Environmental Sciences, James Cook University, Townsville, QLD 4811, Australia

\*corresponding author, [rheuer@rsmas.miami.edu](mailto:rheuer@rsmas.miami.edu), 305-421-4665

1

### 2 Supplementary Methods

3 The Henderson Hasselbach equation was used to estimate pCO<sub>2</sub> in brain tissue from measured  
4 pH and HCO<sub>3</sub><sup>-</sup> equivalents (≈total CO<sub>2</sub>):

5 
$$pCO_2 = [total\ CO_2] / (\alpha CO_2 * (10^{pH-pK_a}) + \alpha CO_2)$$

6 For our calculations the following constants were applied:  $\alpha=0.038$ ,  $pK_a=6.04$ .

7

8 Supplementary Figure S1: Verification of double endpoint titration methodology using known

9 HCO<sub>3</sub><sup>-</sup> standards: Double endpoint titrations performed on titration solution (50 mM NaCl) with

10 no addition of HCO<sub>3</sub><sup>-</sup> (0), 0.5  $\mu$ mol HCO<sub>3</sub><sup>-</sup>, and 1.0  $\mu$ mol HCO<sub>3</sub><sup>-</sup>. The chosen HCO<sub>3</sub><sup>-</sup> standards

11 bracketed the values measured from the analyzed samples. The dashed line represents perfect

12 agreement between added and measured values. The solid line represents the linear regression

13 performed on actual measured standards (slope=0.98,  $r^2=0.9991$ ). The difference between to

14 the two lines represents background that was corrected for in reported values.

15

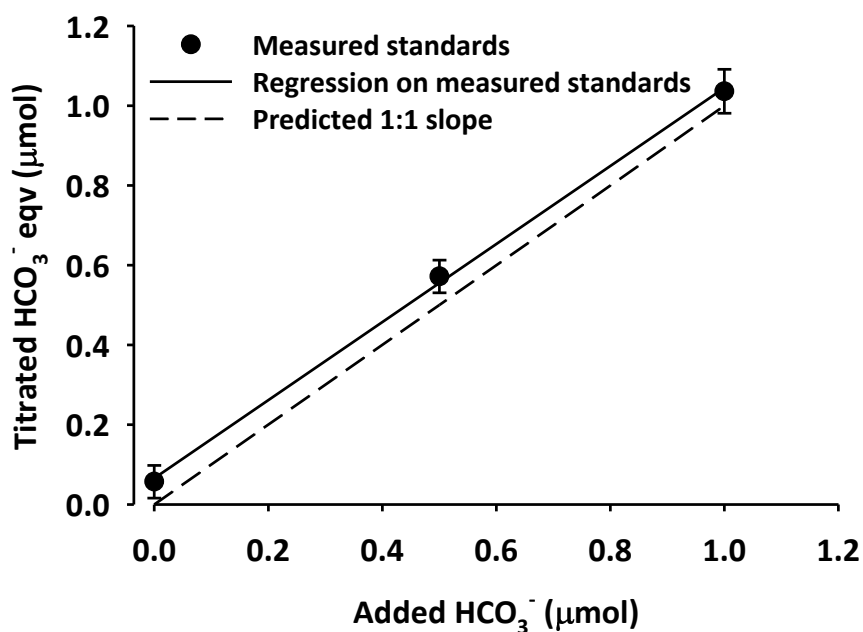

16 Supplementary Table S1: Water chemistry parameters. Values are presented as means  
 17  $\pm$  standard deviation.  $\text{PCO}_2$  was estimated using values of  $\text{pH}_{\text{NBS}}$ , TA, salinity, and  
 18 temperature in CO2SYS using the constants K1 from Merzbach et al (1973) refit by  
 19 Dickson and Miller (1987), and Dickson for  $\text{KHSO}_4$  (Pierrot et al. 2006).

|                                           | $\text{pH}_{\text{NBS}}$ | $\text{PCO}_2$<br>( $\mu\text{atm}$ ) | Alkalinity<br>( $\mu\text{mol kg}^{-1}$ ) | Salinity<br>(p.p.t.) | Temp.<br>( $^{\circ}\text{C}$ ) | $\text{PCO}_2$<br>(NDIR)<br>( $\mu\text{atm}$ ) |
|-------------------------------------------|--------------------------|---------------------------------------|-------------------------------------------|----------------------|---------------------------------|-------------------------------------------------|
| Control<br>(ambient)                      | $8.15 \pm .02$           | $431 \pm 20$                          | $2277 \pm 9$                              | $35.1 \pm 0.05$      | $27.4 \pm 0.5$                  | $437 \pm 23$                                    |
| 1900 $\mu\text{atm}$<br>( $\text{CO}_2$ ) | $7.58 \pm .02$           | $1945 \pm 96$                         | $2271 \pm 8$                              | $35.0 \pm 0.06$      | $27.6 \pm 0.5$                  | $1912 \pm 67$                                   |

20 Supplementary Table S2: Values used to calculate  $E_{GABA}$  in Figure 3 and to calculate  $E_{GABA}$  in a  
 21 polar species under two temperature scenarios  
 22

|                           | Temp.<br>(°C) | [HCO <sub>3</sub> <sup>-</sup> ] <sub>o</sub> | [HCO <sub>3</sub> <sup>-</sup> ] <sub>i</sub> | [Cl <sup>-</sup> ] <sub>o</sub> | [Cl <sup>-</sup> ] <sub>i</sub> |
|---------------------------|---------------|-----------------------------------------------|-----------------------------------------------|---------------------------------|---------------------------------|
| <b>Damselfish</b>         |               |                                               |                                               |                                 |                                 |
| Control                   | 27            | 15.3                                          | 8.8                                           | 150                             | 8                               |
| 1900 μatm CO <sub>2</sub> | 27            | 19.8                                          | 11.2                                          | 145.6                           | 8                               |
| <b>Toadfish</b>           |               |                                               |                                               |                                 |                                 |
| Control                   | 25            | 3.3                                           | 1.8                                           | 150                             | 8                               |
| 1900 μatm CO <sub>2</sub> | 25            | 6.3                                           | 5.0                                           | 147                             | 8                               |
| <b>Rockcod</b>            |               |                                               |                                               |                                 |                                 |
| Control                   | 1             | 8.05                                          | 3.99                                          | 150                             | 6                               |
| 2000 μatm CO <sub>2</sub> | 1             | 11.28                                         | 6.72                                          | 146.8                           | 6                               |
| <b>Rockcod</b>            |               |                                               |                                               |                                 |                                 |
| Control                   | 7             | 6.31                                          | 5.29                                          | 150                             | 6                               |
| 2000 μatm CO <sub>2</sub> | 7             | 10.08                                         | 6.85                                          | 146.2                           | 6                               |

Values used for  $E_{GABA}$  calculations (equation 1) in Figure 3. Values for toadfish were taken from (Esbaugh et al. 2012) and intracellular HCO<sub>3</sub><sup>-</sup> values were calculated in (Heuer and Grosell 2014) from this data. Values for the marbled rockcod were taken from (Strobel et al. 2012) and are not presented in Figure 3.

23

Supplementary Figure S2: Representative dye tests using two choice flume chamber.

Image shows a typical dye test using two-choice flume chamber that is representative of dye tests conducted in the present study. The test indicates that flows presented the fish with a distinct choice between two separate flows. Image credit: Michael Jarrold

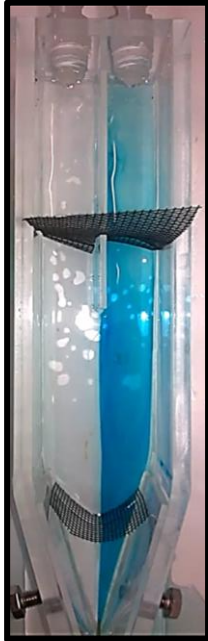

## References

- 25 Esbaugh, A.J., R. Heuer and M. Grosell. 2012. Impacts of ocean acidification on  
26 respiratory gas exchange and acid-base balance in a marine teleost, *Opsanus beta*.  
27 *Journal of Comparative Physiology B: Biochemical, Systemic, and Environmental*  
28 *Physiology* 182: 921-934.
- 29 Heuer, R.M., and M. Grosell. 2014. Physiological impacts of elevated carbon dioxide  
30 and ocean acidification on fish. *American Journal of Physiology Regulatory Integrative*  
31 *and Comparative Physiology* 307: R1061-R1084.
- 32 Pierrot, D., E. Lewis and D. Wallace. 2006. MS Excel program developed for CO<sub>2</sub>  
33 system calculations. ORNL/CDIAC-105a. Carbon Dioxide Information Analysis Center,  
34 Oak Ridge National Laboratory, US Department of Energy, Oak Ridge, Tennessee.
- 35 Strobel, A., S. Bennecke, E. Leo, K. Mintenbeck, H.O. Poertner and F.C. Mark. 2012.  
36 Metabolic shifts in the Antarctic fish *Notothenia rossii* in response to rising temperature  
37 and PCO<sub>2</sub>. *Frontiers in Zoology* 9.
- 38
